# Supplementary material for: Ethnobotanical appraisal and cultural values of medicinally important wild edible vegetables of Lesser Himalayas-Pakistan
Source: Springer Nature journal article supplement (doi:10.1186/1746-4269-9-66), 2013-09-14
Supplement: 13002_2013_369_MOESM3_ESM.pdf [file 13002_2013_369_MOESM3_ESM.pdf]

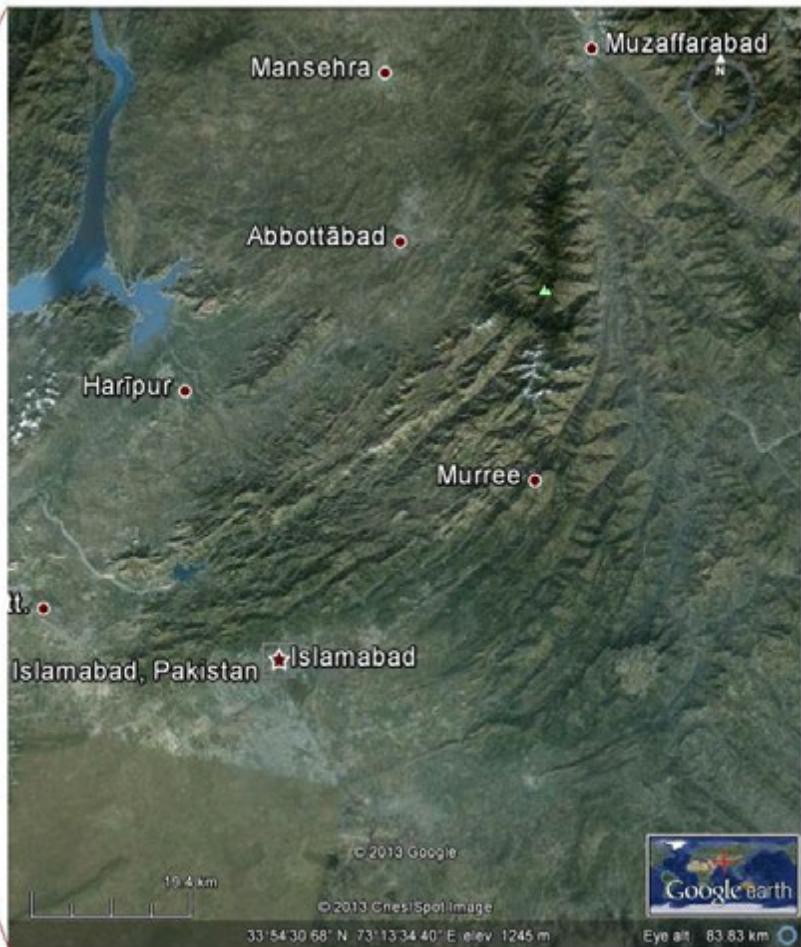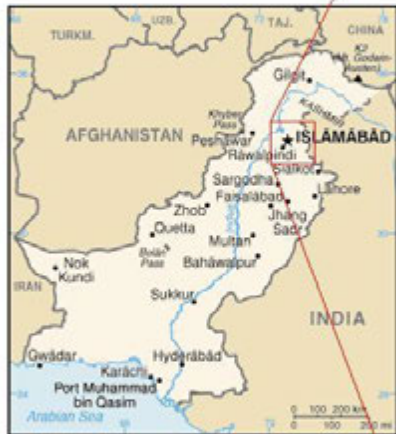

Mansehra

Muzaffarabad

Abbottabad

Haripur

Murree

Islamabad, Pakistan

Islamabad

© 2013 Google

19.4 km

© 2013 Cnes/Spot Image

33°54'30.68" N, 73°13'34.40" E, elev. 1245 m

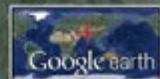

Eye alt 83.83 km
