# Supplementary material for: Ethnobotanical appraisal and cultural values of medicinally important wild edible vegetables of Lesser Himalayas-Pakistan
Source: Springer Nature journal article supplement (doi:10.1186/1746-4269-9-66), 2013-09-14
Supplement: 13002_2013_369_MOESM4_ESM.pdf [file 13002_2013_369_MOESM4_ESM.pdf]

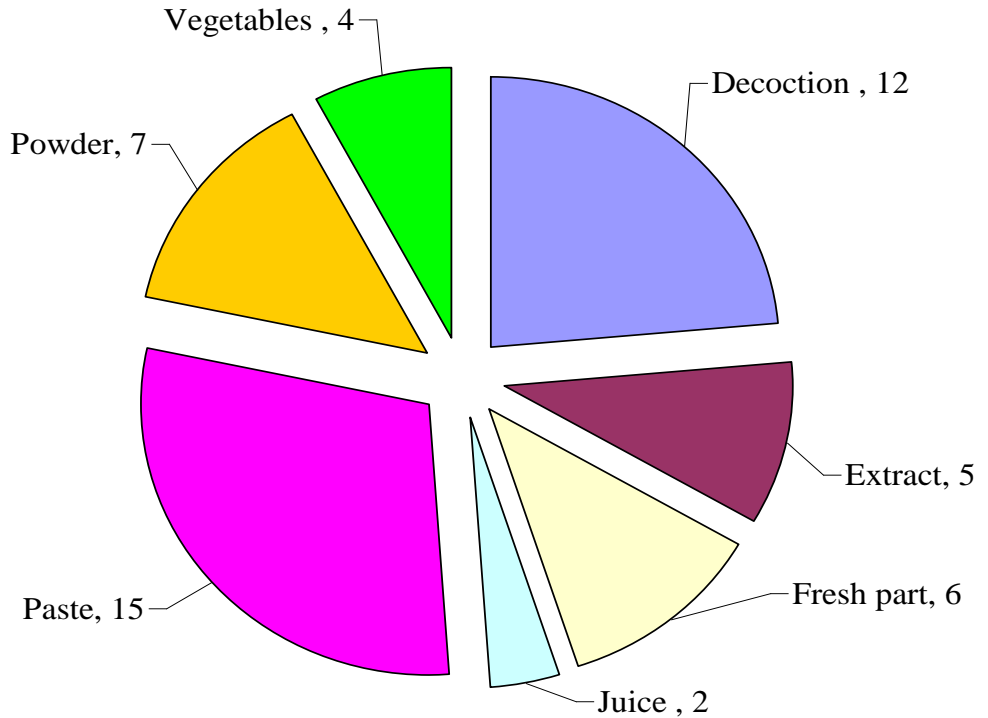

**Modes of preparation (Vegetables)**
